# Supplementary material
Source: Research Square preprint supplement (doi:10.21203/rs.3.rs-9137833/v1)
Supplement: Supplementary file 1 [file af9f4d1e62a9cebaffea8f6b.docx]

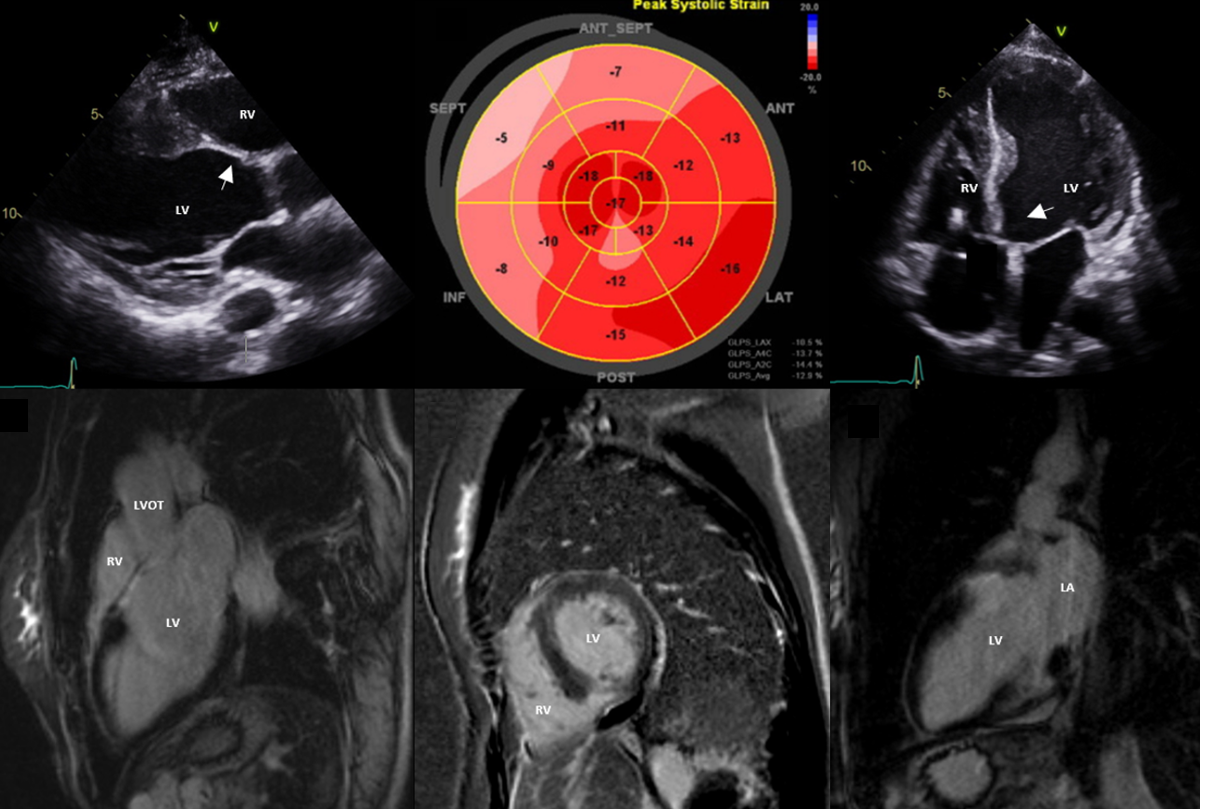


A high index of suspicion is needed for a diagnosis of cardiac sarcoiodsis that requires the exclusion of other mimics, including genetic cardiomyopathies and viral myocarditis. A combination of multimodality imaging, endomyocardial biopsy, and a multidisciplinary team approach is required to identify red flags suggestive of the disease and to determine whether an individual is likely to have cardiac sarcoidosis.
